# Supplementary material for: Enhancement of Cu+ stability under a reducing atmosphere by the long-range electromagnetic effect of Au
Source: Royal Society of Chemistry journal article supplement (doi:10.1039/d2nr02407a), 2022-01-01
Supplement: d2nr02407a1.pdf [file d2nr02407a1.pdf]

## Supporting Information for

# Enhancement of Cu<sup>+</sup> stability under a reducing atmosphere by remote electromagnetic effects of Au

Xin Huang<sup>a,b</sup>, Haitao Li<sup>a,\*</sup>, Yin Zhang<sup>a</sup>, Ruifang Wu<sup>a</sup>, Lijun Ban<sup>b</sup>, Lin Xi<sup>b</sup>, Zhifang Yin<sup>b</sup>, Jian Peng<sup>b</sup>, Yongxiang Zhao<sup>a,\*</sup>, Li Fang<sup>b,\*</sup>

<sup>a</sup> Engineering Research Center of Ministry of Education for Fine Chemicals, Shanxi University, Taiyuan 030006, China.

<sup>b</sup> School of Chemistry and Chemical Engineering, Shanxi University, Taiyuan 030006, China.

### \*Corresponding author

Address: Shanxi University, 92 Wucheng Road ,Taiyuan 030006, China.

Haitao Li, Email: htli@sxu.edu.cn

Yongxiang Zhao, Email: yxzhaos@sxu.edu.cn

Li Fang, Email: fangli@sxu.edu.cn

**Preparation of Au NPs.** Monodispersed spherical Au NPs with diameters of ~16 nm were prepared by the Frens method.<sup>1</sup> 200 ml of 0.01 wt% HAuCl<sub>4</sub> solution was placed in a 250 ml three-neck flask, and the solution was stirred under reflux and heated to boiling (400 rpm). 3.6 ml of preheated 1.0 wt% sodium citrate solution was added, the mixture was boiled for 30 min, cooled to room temperature (25°C) to obtain burgundy Au NPs.

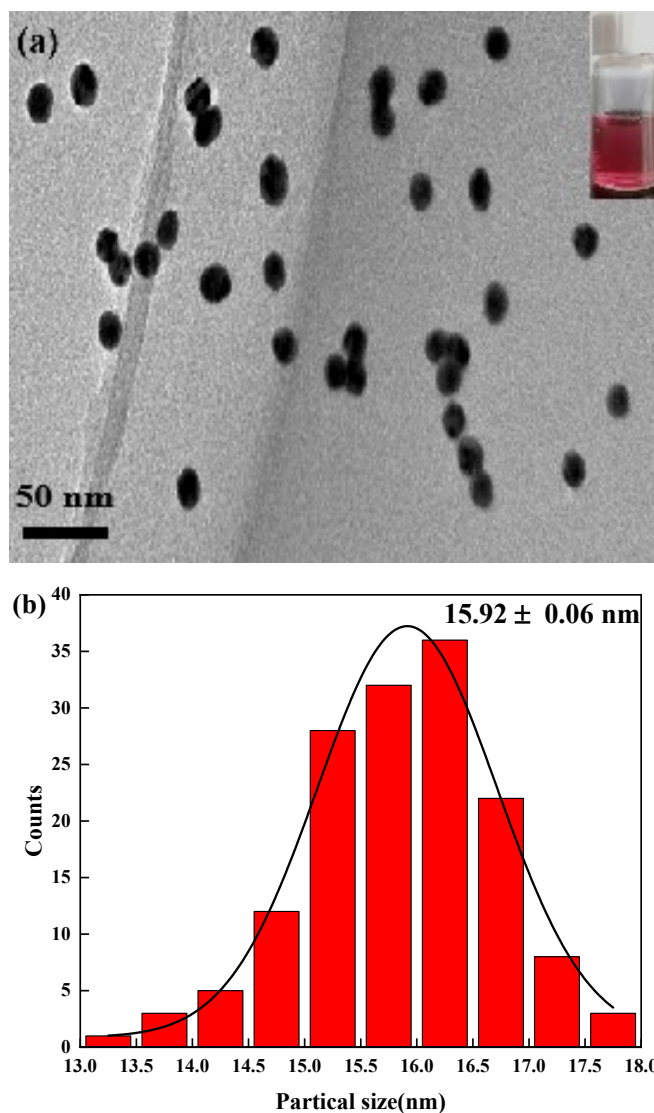

**Fig. S1.** (a) TEM image with inset photo (b) particulate size histogram of Au NPs.

**Table S1.** Cu and Au Content in different catalysts analyzed by ICP-OES and catalytic performance of **propargyl alcohol**.

| Catalysts                   | Weight ratio (wt%) |      | $n_{\text{Cu}}$<br>( $\times 10^{-2} \text{ mol} \cdot \text{g}^{-1}$ ) | Catalytic performance <sup>[a]</sup>                 |                                                            |
|-----------------------------|--------------------|------|-------------------------------------------------------------------------|------------------------------------------------------|------------------------------------------------------------|
|                             | Cu                 | Au   |                                                                         | <b>propargyl alcohol</b><br>yield (%) <sup>[b]</sup> | <b>propargyl alcohol</b><br>selectivity (%) <sup>[c]</sup> |
| pure Cu <sub>2</sub> O      | 74.53              | --   | 11.73                                                                   | 0.53                                                 | 1.38                                                       |
| Au@Cu <sub>2</sub> O-<br>27 | 44.97              | 5.85 | 7.08                                                                    | 1.37                                                 | 2.93                                                       |
| Au@Cu <sub>2</sub> O-<br>33 | 55.54              | 4.58 | 8.74                                                                    | 1.36                                                 | 2.42                                                       |
| Au@Cu <sub>2</sub> O-<br>40 | 62.61              | 3.84 | 9.85                                                                    | 1.67                                                 | 2.72                                                       |
| Au@Cu <sub>2</sub> O-<br>47 | 69.68              | 3.02 | 10.96                                                                   | 2.13                                                 | 3.21                                                       |
| Au@Cu <sub>2</sub> O-<br>55 | 72.16              | 2.12 | 11.35                                                                   | 1.68                                                 | 2.47                                                       |

[a] Reaction conditions: the catalyst was dispersed in 35wt% formaldehyde solution, and reacted at 90°C for 10 h with the C<sub>2</sub>H<sub>2</sub> flow rate of 30 ml/min.

[b] **propargyl alcohol** yield (%) =  $\frac{m_{\text{propargyl alcohol}} \times 30.03}{m_0 \times 56.07} \times 100\%$ ; where  $m_{\text{propargyl alcohol}}$  is the total mass of **propargyl alcohol** in the reaction solution, g;  $m_0$  is the total mass of formaldehyde added, g.

[c] **propargyl alcohol** selectivity (%) =  $\frac{\text{propargyl alcohol yield}}{\text{formaldehyde conversion}} \times 100\%$

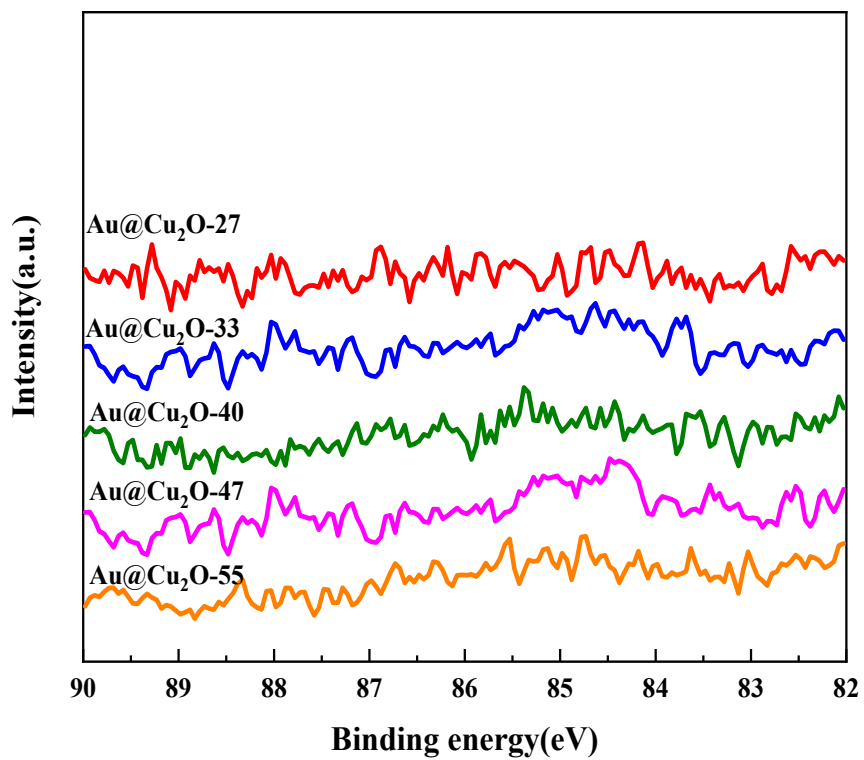

**Fig. S2.** High-resolution Au 4f XPS spectra for fresh Au@Cu<sub>2</sub>O core-shell NPs with different Cu<sub>2</sub>O shell thickness.

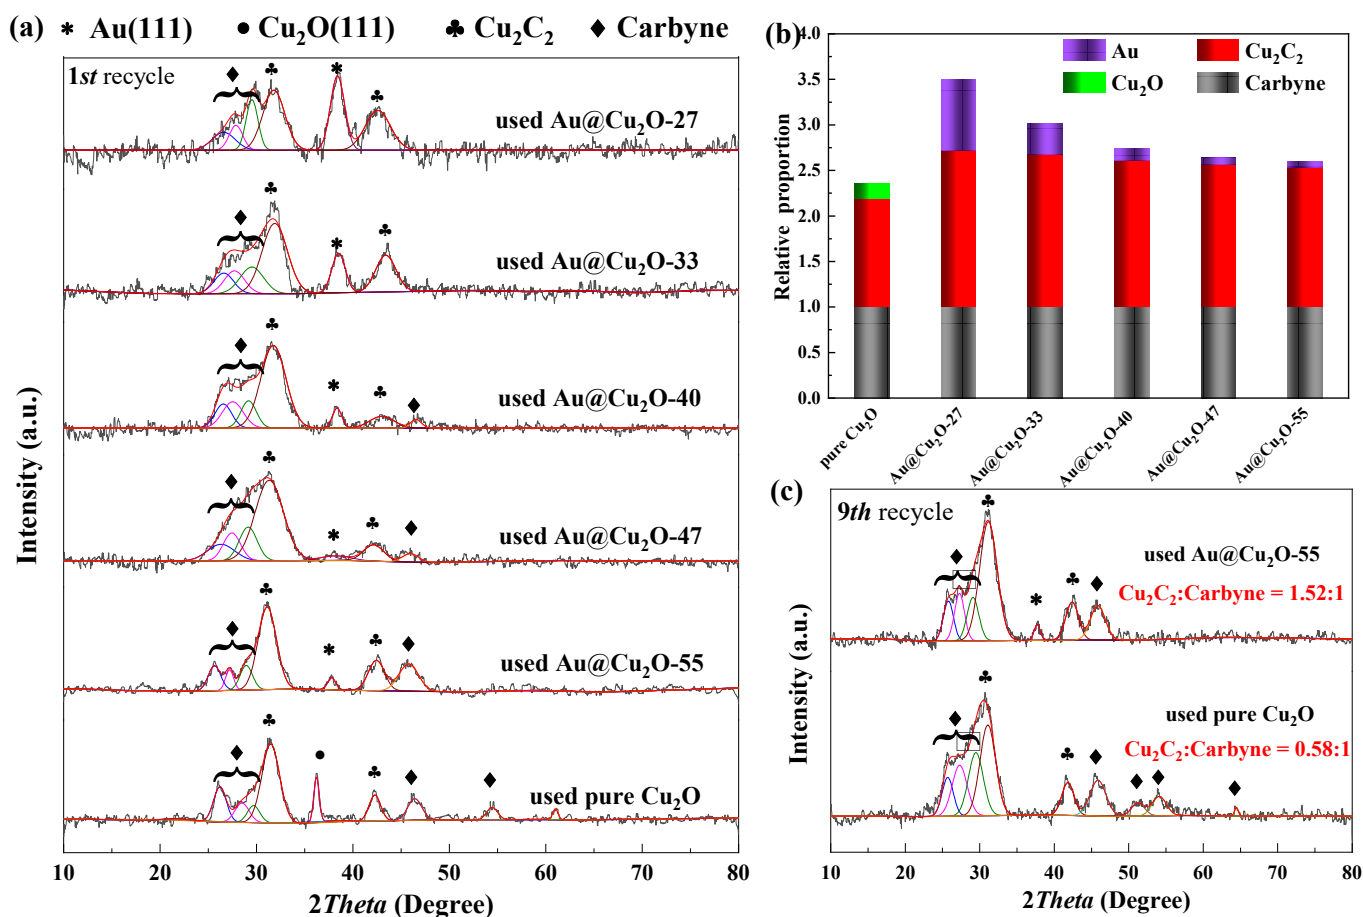

**Fig. S3.** (a) XRD patterns of the activated-catalysts. (b) Diagram of the proportion of Au, Cu<sub>2</sub>O and Cu<sub>2</sub>C<sub>2</sub> to carbyne. (c) XRD patterns of the used pure Cu<sub>2</sub>O and Au@Cu<sub>2</sub>O catalyst after 9<sup>th</sup> recycle. As shown in Fig. S3, both the used pure Cu<sub>2</sub>O and Au@Cu<sub>2</sub>O catalysts showed significant characteristic diffraction peaks corresponding to Cu<sub>2</sub>C<sub>2</sub> at 32.0° and 42.3°.<sup>2</sup> Dispersion peaks with low intensity at 27.2°, 29.1°, and 51.2° were attributed to the linear carbon characteristic peaks containing terminal copper in the catalyst after reaction.<sup>3,4</sup> The amorphous graphite-like structure diffraction peaks (JCPDS no.26-1079)<sup>4,5</sup> at 26.6°, 46.3°, 54.2°, and 63.6° were attributed to the presence of linear carbon with poorly crystallinity in the catalyst after the reaction. After the catalysts treated in formaldehyde and acetylene

atmosphere for 10h, no characteristic diffraction peaks corresponding to  $\text{Cu}_2\text{O}$  were observed in spectra of  $\text{Au}@Cu_2\text{O}$  core-shell catalysts, while the weak characteristic diffraction peak of  $\text{Cu}_2\text{O}$  (111) can still be observed at  $36.4^\circ$  in spectra of pure  $\text{Cu}_2\text{O}$  catalyst. The literature<sup>2</sup> reported that X-ray diffraction intensity can usually be used as the basis for quantitative analysis of the relative safety of cuprous acetylene due to the explosive nature of cuprous acetylene. The analysis results are shown in the Fig.S3b and listed in Table 1 of the text.

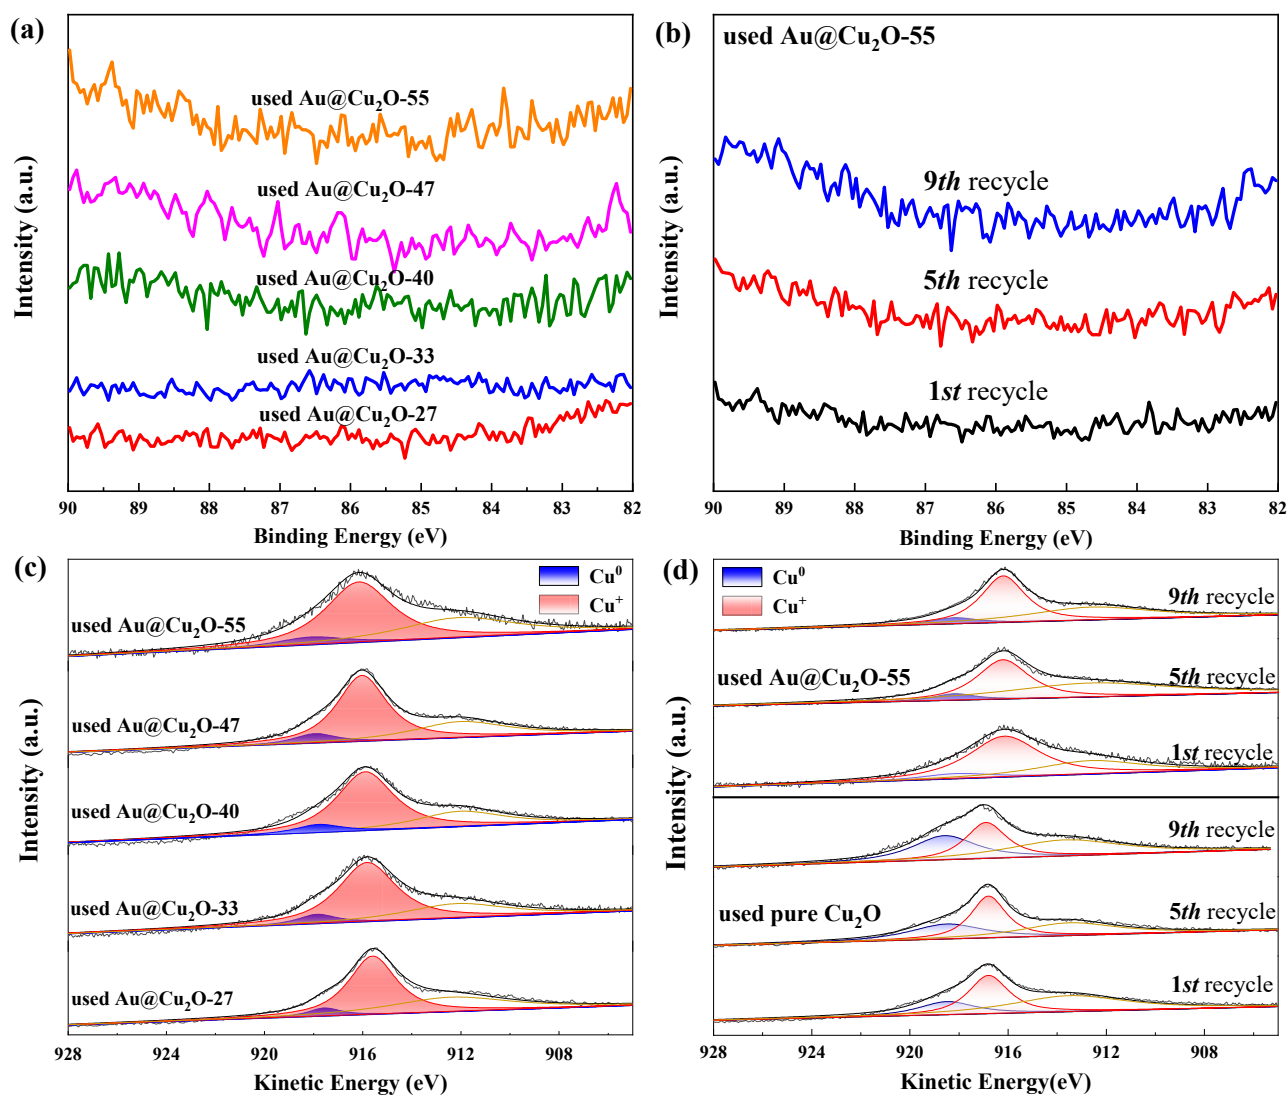

**Fig. S4.** (a-b) Au 4f XPS spectra of  $\text{Au}@Cu_2O$  catalysts after formaldehyde acetynylation. (c) Cu LMM XAES of  $\text{Au}@Cu_2O$  catalysts after 1st recycle. (d) Cu LMM XAES of pure  $\text{Cu}_2\text{O}$  and  $\text{Au}@Cu_2O$ -55 catalyst after different reaction cycles.

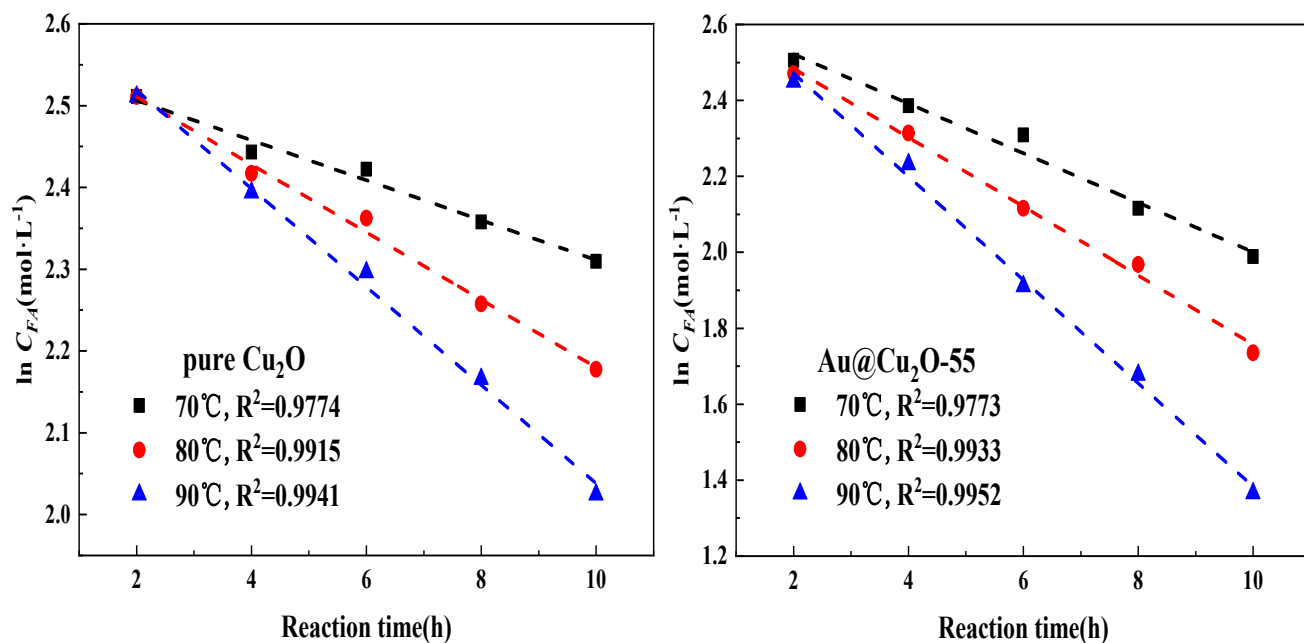

**Fig. S5.**  $\ln C_{FA}$  VS. reaction time plots of the rate-determining step over pure Cu<sub>2</sub>O and Au@Cu<sub>2</sub>O-55 catalyst at 70 - 90°C.

### References

- 1 G.Frens, *Nat. Phy. Sci.*, 1973, **241**, 20–22.
- 2 B. Helmut, *Springer Science & Business Media*, 1987, 140–142.
- 3 H. Werner, D. Herein, J. Blöcker, B. Henschke, U. Tegtmeier, Th. Schedel-Niedrig, M. Keil, A.M. Bradshaw, R. Schlögl, *Chem. Phys. Lett.*, 1992, **194**, 62–66.
- 4 F. Cataldo, *Polym. Int.*, 1997, **44**, 191–200.
- 5 F. Cataldo, *Carbon*, 1999, **37**, 161–163.
